# Supplementary material for: Glucosinolate Diversity Analysis in Choy Sum (Brassica rapa subsp. chinensis var. parachinensis) Germplasms for Functional Food Breeding
Source: MDPI journal article supplement (doi:10.3390/foods12122400), 2023-06-16
Supplement: s1 [file s1]

**Table S1.** Passport date of choy sum germplasms.

| Accessions No | RDA-No   | Name                | Statues  | Origin |
|---------------|----------|---------------------|----------|--------|
| 1             | IT228139 | CHOY SUM EX CHINA 1 | Cultivar | MYS    |
| 2             | IT228140 | CHOY SUM EX CHINA 2 | Cultivar | MYS    |
| 3             | IT228155 | 40 DAYS RAPE        | Cultivar | TWN    |
| 4             | IT228157 | ABD 5 BATON BLANC   | Cultivar | MUS    |
| 5             | IT228164 | B01134              | Landrace | IDN    |
| 6             | IT259398 | THA-SSJ-2002-6      | Cultivar | THA    |
| 7             | IT293077 | 6202                | Landrace | THA    |
| 8             | IT293078 | 7580                | Landrace | CHN    |
| 9             | IT297474 | Kapi Shak           | Landrace | BGD    |
| 10            | IT301823 | Xianggang cai xin   | Cultivar | CHN    |
| 11            | IT303512 | 40 Days Rape        | Landrace | TWN    |
| 12            | IT303513 | Kra-Chon            | Landrace | THA    |
| 13            | IT303514 | Cai Ngat            | Landrace | VNM    |
| 14            | IT303517 | Phak Kat Moane      | Landrace | LAO    |
| 15            | IT303518 | VI 033147           | Landrace | MYS    |
| 16            | IT303519 | VI 033153           | Landrace | MYS    |
| 17            | IT306673 | Abd 5 Bouquet       | Landrace | MUS    |
| 18            | IT306677 | B 01019             | Landrace | THA    |
| 19            | IT306680 | B 01024             | Landrace | THA    |
| 20            | IT306688 | Cai Ngat            | Landrace | VNM    |
| 21            | IT306710 | 80 Days Rape        | Landrace | TWN    |
| 22            | IT306711 | 80 Days Rape        | Landrace | TWN    |
| 23            | IT306721 | Green Petiole Var   | Landrace | MYS    |

**Table S.2.** Kaiser-Meyer-Olkin measure of sampling adequacy

|     |       |
|-----|-------|
| GIB | 0.618 |
| SIN | 0.523 |
| GCH | 0.680 |
| GER | 0.692 |
| GRE | 0.650 |
| GNA | 0.546 |
| PRO | 0.514 |
| EPI | 0.540 |
| GRH | 0.751 |
| GRA | 0.617 |
| GBE | 0.586 |
| GBN | 0.551 |
| GTL | 0.534 |

|     |       |
|-----|-------|
| GNS | 0.610 |
| GBB | 0.604 |
| SNB | 0.629 |
| GBC | 0.546 |
| KMO | 0.601 |
